# Supplementary material
Source: PubMed Central journal article supplement (PMC2242750)
Supplement: mmc1.pdf [file mmc1.pdf]

## Supplemental material

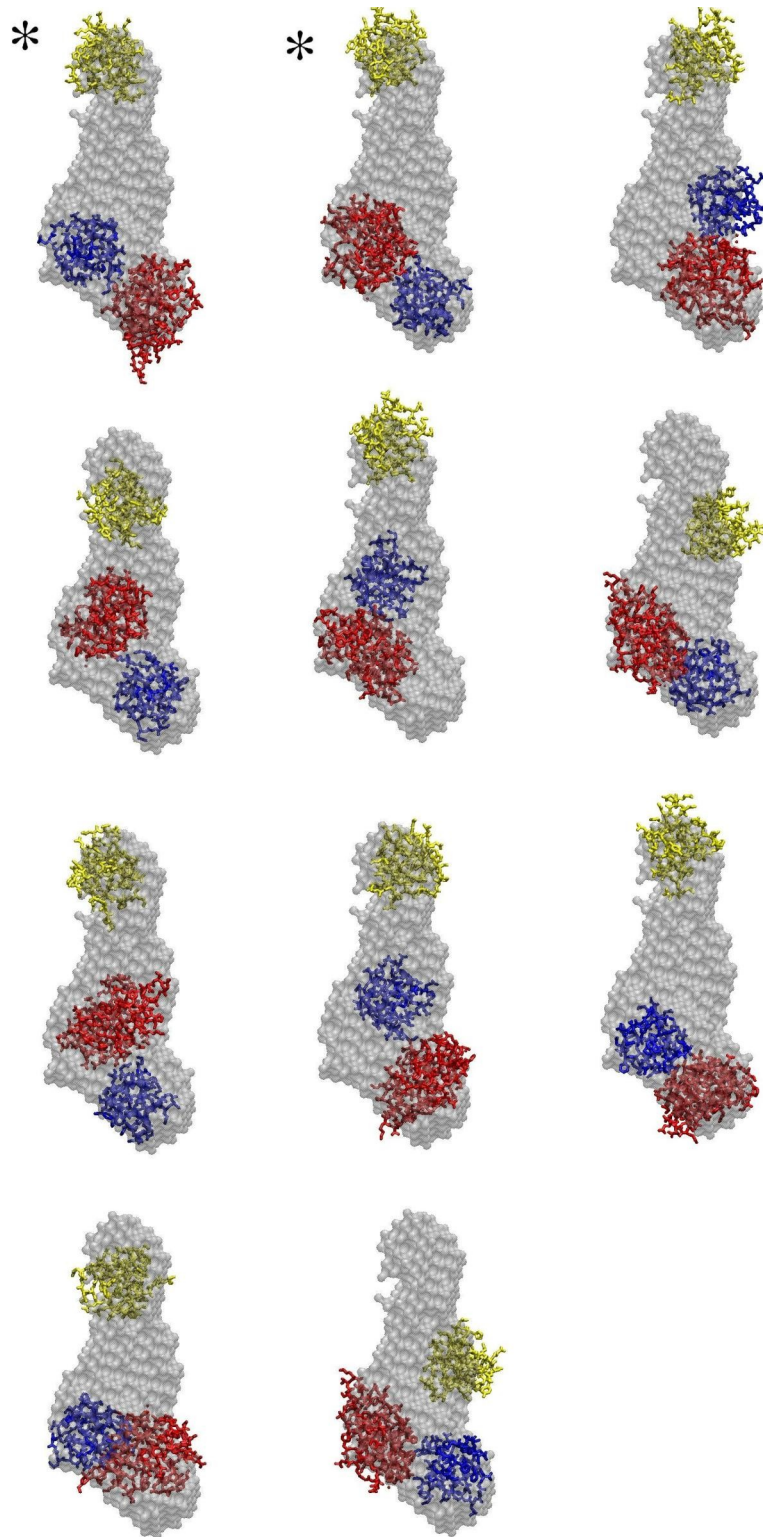

Models of the possible arrangement of the GADS domains into a volume defined by fitting the SAXS data. Repeating the simulated annealing of the high resolution domains into the low resolution volume of GADS yielded 11 different conformation, from which the two models indicated with the asterisk are the most probable ( $>0.4$  each).
